# Supplementary material for: Presence of T cells directed against CD20-derived peptides in healthy individuals and lymphoma patients
Source: Springer Nature journal article supplement (doi:10.1007/s00262-019-02389-7), 2019-09-07
Supplement: MOESM1 [file 17148622]

**Supplementary Table 1. Sequences of HLA-DR-restricted CD20-derived peptides**

| Peptide Sequence                                   | Number of amino-acids |
|----------------------------------------------------|-----------------------|
| <b>huMHC II_Mix 1</b>                              |                       |
| <sup>22</sup> AMQSGPKPLFRRMSSLVGPT <sup>41</sup>   | 20                    |
| <sup>25</sup> SGPKPLFRRMSSLVGPTQSF <sup>44</sup>   | 20                    |
| <sup>28</sup> KPLFRRMSSLVGPTQSFFMR <sup>47</sup>   | 20                    |
| <b>huMHC II_Mix 2</b>                              |                       |
| <sup>31</sup> FRRMSSLVGPTQSFFMRESK <sup>50</sup>   | 20                    |
| <sup>34</sup> MSSLVGPTQSFFMRESKTLG <sup>53</sup>   | 20                    |
| <sup>37</sup> LVGPTQSFFMRESKTLGAVQ <sup>56</sup>   | 20                    |
| <b>huMHC II_Mix 3</b>                              |                       |
| <sup>40</sup> PTQSFFMRESKTLGAVQIMN <sup>59</sup>   | 20                    |
| <sup>43</sup> SFFMRESKTLGAVQIMNG <sup>60</sup>     | 18                    |
| <b>huMHC II_Mix 4</b>                              |                       |
| <sup>58</sup> MNGLFHIALGGLLMIPAG <sup>75</sup>     | 18                    |
| <sup>91</sup> GIMYIISGSLLAATEKNS <sup>108</sup>    | 18                    |
| <b>huMHC II_Mix 5</b>                              |                       |
| <sup>112</sup> LVKGMIMNSLSLFAAISGM <sup>131</sup>  | 20                    |
| <sup>115</sup> GKMIMNSLSLFAAISGMILS <sup>134</sup> | 20                    |
| <sup>118</sup> IMNSLSLFAAISGMILSIMD <sup>137</sup> | 20                    |
| <sup>121</sup> SLSLFAAISGMILSIMDI <sup>138</sup>   | 18                    |
| <b>huMHC II_Mix 6</b>                              |                       |
| <sup>133</sup> LSIMDILNIKISHFLKMESL <sup>152</sup> | 20                    |
| <sup>136</sup> MDILNIKISHFLKMESLNFI <sup>155</sup> | 20                    |
| <sup>139</sup> LNKISHFLKMESLNFIRAH <sup>158</sup>  | 20                    |
| <b>huMHC II_Mix 7</b>                              |                       |
| <sup>142</sup> KISHFLKMESLNFIRAHTPY <sup>161</sup> | 20                    |
| <sup>145</sup> HFLKMESLNFIRAHTPYINI <sup>164</sup> | 20                    |
| <b>huMHC II_Mix 8</b>                              |                       |
| <sup>148</sup> KMESLNFIRAHTPYINIYNC <sup>167</sup> | 20                    |
| <sup>151</sup> SLNFIRAHTPYINIYNCEPA <sup>170</sup> | 20                    |
| <b>huMHC II_Mix 9</b>                              |                       |
| <sup>175</sup> KNSPSTQYCYSIQSLFLG <sup>192</sup>   | 18                    |
| <sup>214</sup> NEWKRTCSRPKSNIV <sup>228</sup>      | 15                    |

**Supplementary Table 2. IFN- $\gamma$  responses to CD20-derived human MHC-restricted peptides in cells from healthy donors (PBMCs,  $n=26$ ; splenocytes,  $n=7$ ) and FL patients (PBMCs) ( $n=9$ )**

| Samples       | Pool 22-43*<br>(SFU/10 <sup>5</sup> cells) | Pool 58-121*<br>(SFU/10 <sup>5</sup> cells) | Pool 133-151*<br>(SFU/10 <sup>5</sup> cells) |
|---------------|--------------------------------------------|---------------------------------------------|----------------------------------------------|
| PBMC HD1      | 0                                          | 0                                           | 6                                            |
| PBMC HD2      | 0                                          | 0                                           | 0                                            |
| PBMC HD3      | 0                                          | 0                                           | 0                                            |
| PBMC HD4      | 0                                          | 53                                          | 4                                            |
| PBMC HD5      | 3                                          | 53                                          | 11                                           |
| PBMC HD6      | 3                                          | 28                                          | 43                                           |
| PBMC HD7      | 7                                          | 7                                           | 13                                           |
| PBMC HD8      | 131                                        | 56                                          | 93                                           |
| PBMC HD9      | 0                                          | 0                                           | 0                                            |
| PBMC HD10     | 0                                          | 23                                          | 6                                            |
| PBMC HD11     | 6                                          | 85                                          | 32                                           |
| PBMC HD12     | 309                                        | 352                                         | 309                                          |
| PBMC HD13     | 397                                        | 346                                         | 361                                          |
| PBMC HD14     | 147                                        | 109                                         | 126                                          |
| PBMC HD15     | 229                                        | 223                                         | 255                                          |
| PBMC HD16     | 0                                          | 0                                           | 0                                            |
| PBMC HD17     | 0                                          | 0                                           | 0                                            |
| PBMC HD18     | 0                                          | 0                                           | 0                                            |
| PBMC HD19     | 0                                          | 0                                           | 0                                            |
| PBMC HD20     | 0                                          | 2                                           | 0                                            |
| PBMC HD21     | 3                                          | 5                                           | 49                                           |
| PBMC HD22     | 129                                        | 67                                          | 230                                          |
| PBMC HD23     | 2                                          | 5                                           | 2                                            |
| PBMC HD24     | 0                                          | 37                                          | 230                                          |
| PBMC HD25     | 0                                          | 0                                           | 131                                          |
| PBMC HD26     | 0                                          | 0                                           | 0                                            |
| Splenocytes 1 | 0                                          | 212                                         | 60                                           |
| Splenocytes 2 | 0                                          | 9                                           | 22                                           |
| Splenocytes 3 | 0                                          | 7                                           | 22                                           |
| Splenocytes 4 | 0                                          | 0                                           | 0                                            |
| Splenocytes 5 | 1                                          | 16                                          | 60                                           |
| Splenocytes 6 | 0                                          | 71                                          | 147                                          |
| Splenocytes 7 | 53                                         | 0                                           | 120                                          |

|          |     |     |     |
|----------|-----|-----|-----|
| PBMC FL1 | 18  | 103 | 581 |
| PBMC FL2 | 4   | 2   | 11  |
| PBMC FL3 | 20  | 12  | 19  |
| PBMC FL4 | 0   | 0   | 0   |
| PBMC FL5 | 0   | 12  | 0   |
| PBMC FL6 | 4   | 44  | 4   |
| PBMC FL7 | 0   | 2   | 0   |
| PBMC FL8 | 0   | 0   | 0   |
| PBMC FL9 | 211 | 16  | 302 |

\*IFN- $\gamma$  production in response to human CD20-derived peptide mixture was analyzed by ELISPOT assays as described in the Materials and Methods section. Numbers represent the mean value of triplicates. The positive threshold was set at  $\geq 10$  spot forming units (SFU) per  $10^5$  cells as previously described [30]. HD: healthy donors.

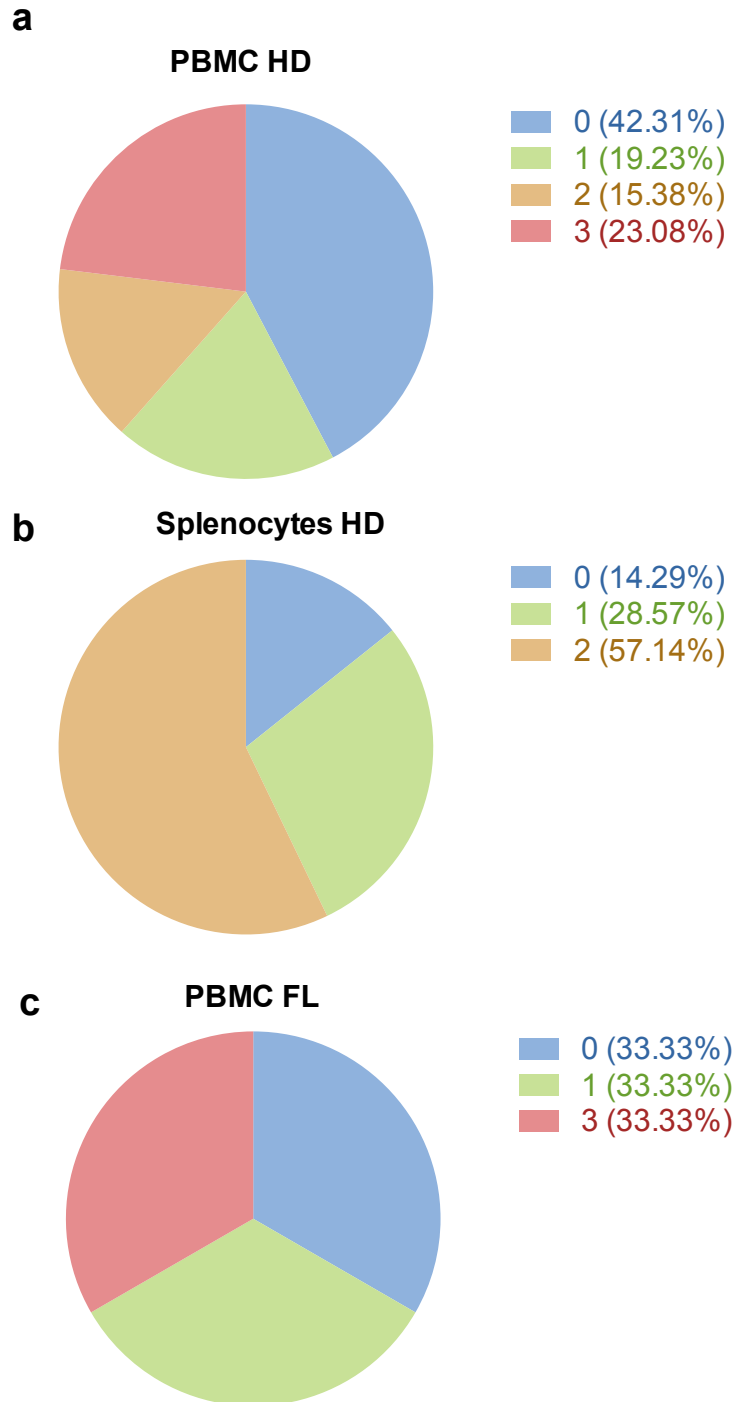

**Supplementary Figure 1.** Frequency of non-responders or responders to one or several pools of MHC II-restricted CD20-derived peptides among healthy individuals or FL patients. Pie charts indicate the percentages of IFN- $\gamma$  responses by PBMC from healthy donors (PBMC HD,  $n=26$ ) **(a)**, by splenocytes from donors (splenocytes HD,  $n=7$ ) **(b)** or by PBMCs from follicular lymphoma patients (PBMC FL,  $n=9$ ) **(c)** to one (in green), two (in orange), or three (in red) pools of CD20-derived peptides. The percentages of non-responders are indicated in blue.

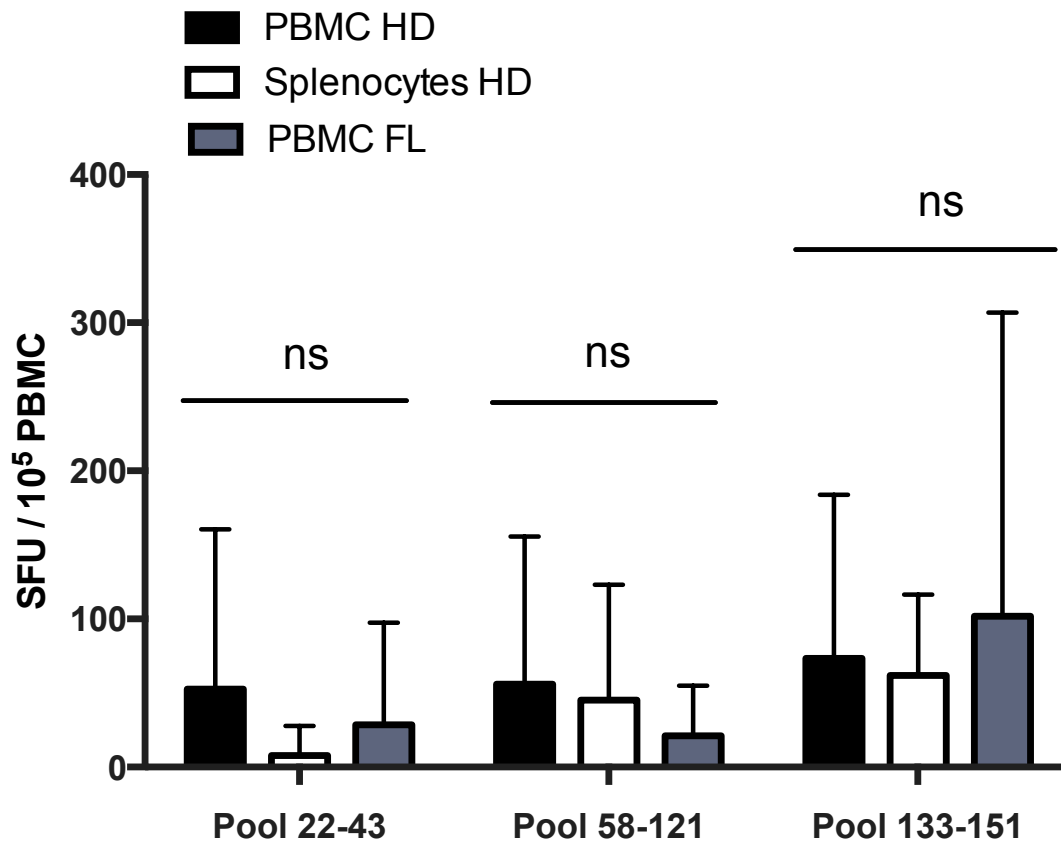

**Supplementary Figure 2.** Comparison of IFN- $\gamma$  responses to the different pools of MHC II-restricted CD20-derived peptides (Pool 22-43, Pool 58-121, Pool 133-151) in PBMCs from healthy donors (PBMC HD,  $n=26$ , black bars) or from follicular lymphoma patients (PBMC FL,  $n=9$ , grey bars), and in splenocytes from healthy individuals (splenocytes HD,  $n=7$ , white bars). IFN- $\gamma$  production was measured by ELISPOT assays as described in the materials and methods section. Results were expressed as mean value of spot-forming units (SFU) per  $10^5$  cells. Nonparametric unpaired Mann-Whitney tests were used for statistical analysis. ns: not significant.

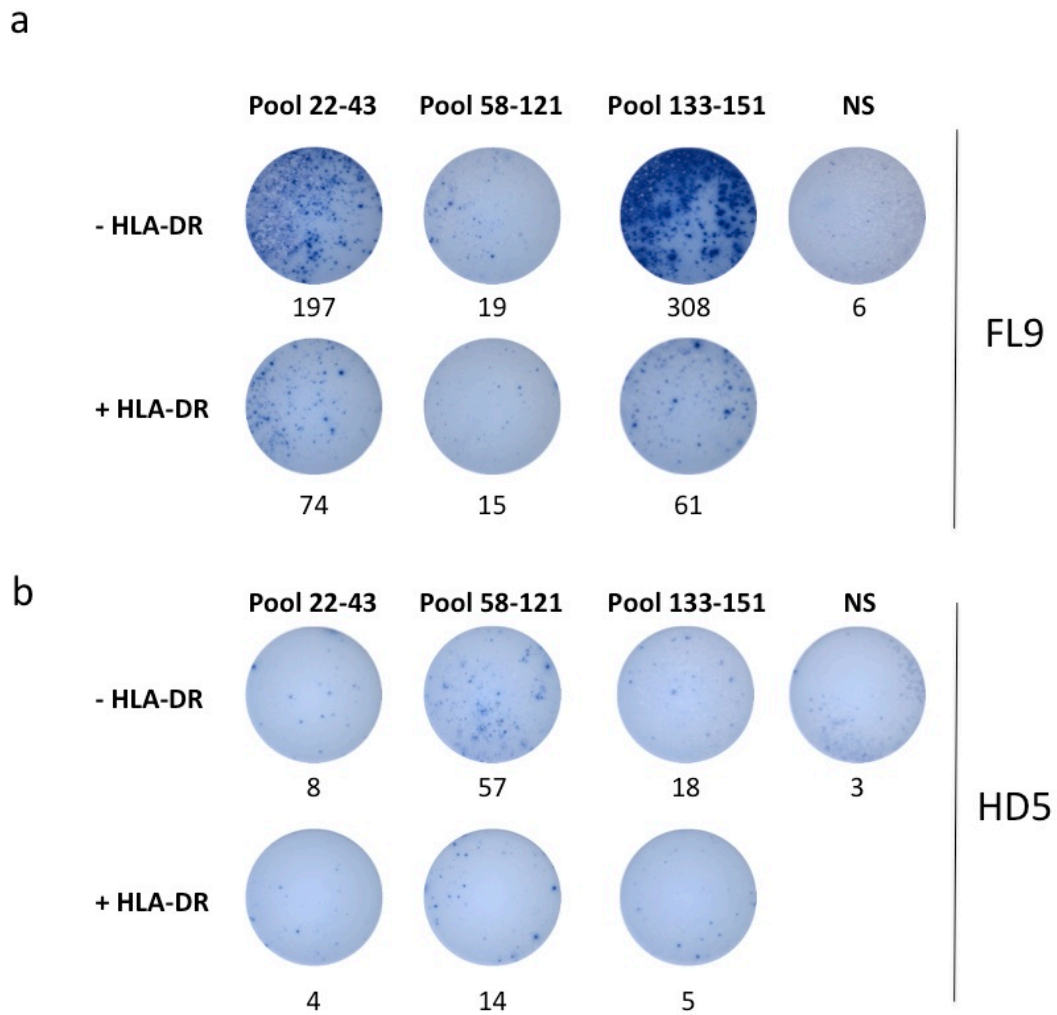

**Supplementary Figure 3.** Representative images of ELISPOT wells depicting IFN- $\gamma$  responses by PBMCs from one FL patient (FL9) **(a)** and one HD (HD5) **(b)** and their blockade by an anti-HLA-DR, -DP, -DQ antibody. Numbers below images indicate the number of SFU/10<sup>5</sup> cells obtained in the corresponding well.

<sup>1</sup> NS: non-stimulated cells.
